# Supplementary material
Source: PubMed Central journal article supplement (PMC1308896)

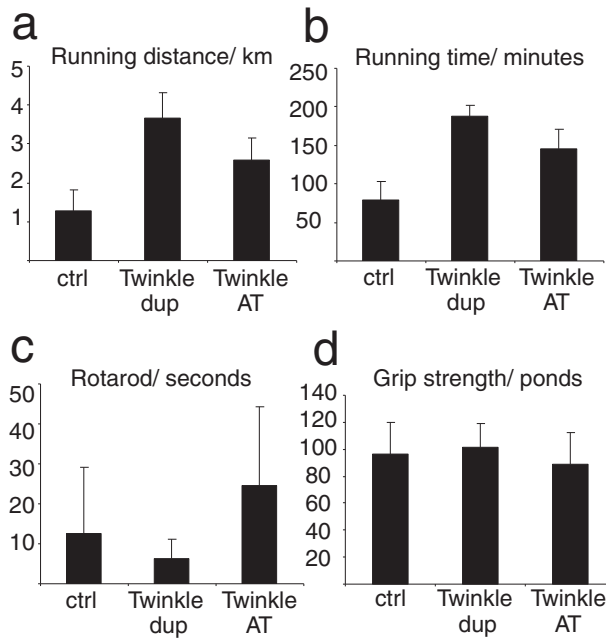

Supplement: pnas_0505551102_1.pdf [file pnas_0505551102_1.pdf]
